# Supplementary material
Source: MDPI journal article supplement (https://www.mdpi.com/2813-2998/3/1/17)
Supplement: s1 [file s1]

Article

# DFT Calculations, Pro-Apoptotic Effects, Anti-Infective Investigations of Alkaloids Isolated from the Stem Bark Extract of *Enantia chlorantha*

Vincent O. Imieje<sup>1\*</sup>, Ahmed A. Zaki<sup>2</sup>, Mansour A. E. Bashar<sup>3\*</sup>, Islam Rady<sup>4,5</sup>, Mohamed A. M. El-Tabakh<sup>3</sup>, Ahmed B. M. Mehany<sup>6</sup>, Mohammed A.E. Abd El-Aziz<sup>3</sup>, E.S. Abou-Amra<sup>7</sup>, Shahd Yasser<sup>8</sup>, Ibraheem M. M. Gobaara<sup>9</sup>, Mohammed A.S. Abourehab<sup>10</sup>, Amany Belal<sup>11,12</sup>, Reham M. Samra<sup>2</sup>, Hussein A. El-Naggar<sup>3</sup>, Abiodun Falodun<sup>1</sup>

1 Department of Pharmaceutical Chemistry, Faculty of Pharmacy, University of Benin, Benin City 300001, Nigeria; vincent.imieje@uniben.edu; A.F (faloabi@uniben.edu)

2 Pharmacognosy Department, Faculty of Pharmacy, Mansoura University, Mansoura 35516, Egypt; ahmed.awad@fulbrightmail.org

3 Marine Biology and Fish Sciences Laboratory, Zoology and Entomology Department, Faculty of Science (Boys), Al-Azhar University, Nasr City, 11884, Cairo, Egypt; dr\_mb2020682@azhar.edu.eg; M.A.E.A (Mohamed.abdelaziz91@azhar.edu.eg); M.A.M.E (Dr.m.eltabakh.201@azhar.edu.eg); H.A.E (Hu\_200000@yahoo.com)

4 Molecular Biology Laboratory, Zoology and Entomology Department, Faculty of Science (Boys); Al-Azhar University, Nasr City, 11884, Cairo, Egypt; iradynas@umn.edu

5 Masonic Cancer Center, Cancer and Cardiovascular Research Building, University of Minnesota Medical School, Minneapolis, MN 55455, USA; iradynas@umn.edu

6 Genetic Engineering Laboratory, Zoology and Entomology Department, Faculty of Science (Boys); Al-Azhar University, Nasr City, 11884, Cairo, Egypt; abelal\_81@yahoo.com

7 Chemistry Department, Faculty of Science (Girls), Al-Azhar University, Nasr City-Cairo 11884, Egypt; Emansadek.59@azhar.edu.eg

8 Faculty of Medicine, Zagazig University, Ash Sharqia Governorate 44511, Egypt; dr\_mb2020682@yahoo.com

9 Invertebrates Laboratory, Zoology and Entomology Department, Faculty of Science (Boys); Al-Azhar University, Nasr City, 11884, Cairo, Egypt; Ibraheemgobaara@azhar.edu.eg

10 Department of Pharmaceutics, Faculty of Pharmacy, Umm Al-Qura University, Makkah 21955, Saudi Arabia; maabourehab@uqu.edu.sa

11 Medicinal Chemistry Department, Faculty of Pharmacy, Beni-Suef University, Beni-Suef, 62514 Egypt

12 Department of Pharmaceutical Chemistry, College of Pharmacy, Taif University, P.O. Box 11099, Taif, 21944 Saudi Arabia; amany.mehani@pharm.bsu.edu.eg

\*Correspondence: : V. O. I. (vincent.imieje@uniben.edu) and M.A.E.B (dr\_mb2020682@azhar.edu.eg).

**Abstract:** Fractionation of the stem bark of *Enantia chlorantha* Oliv yields three alkaloids Palmatine (1), Jatrorrhizine (2), Columbamine (3), and  $\beta$ -Sitosterol (4). In this investigation, density functional theory (DFT) calculations were carried out to evaluate the electronic structure and properties of 1-4 by DFT-B3LYP/6-31G level of theory using Gaussian 09 software. Quantum molecular descriptors of the title compounds: ionization potential (IP) and Electron Affinities (EA), Hardness ( $\eta$ ), Softness (S), Electronegativity ( $\mu$ ), Electrophilic Index ( $\omega$ ), Electron Donating Power ( $\omega^-$ ), Electron Accepting Power ( $\omega^+$ ) and Energy Gap (Eg) have been calculated. The *in vitro* cytotoxicity of the compounds was investigated against MCF-7, HCT116 cancer cell lines using Wi-38 cells as control. The compounds inhibited the proliferation of the MCF-7 and HCT116 cell lines and induced apoptosis *via* up-regulation of caspase-3, Bax, PARP cleavage, and downregulation of Bcl-2. DFT analyses revealed that compounds 1 and 3 have smaller energy gaps, 0.072 and 0.071eV, respectively, with the highest dipole moments, hence, more chemically reactive and exhibited better modulation of caspase-3 enzyme and inhibitory activities of the MCF-3 and HCT116 cell lines. The antimicrobial and antiparasitic evaluation of 1 - 4 showed moderate efficacy against the bacterial strains and moderate antiparasitic activity against *Cichlidogyrus tilapia*.

**Keywords:** *Enantia chlorantha*; DFT; antimicrobial; Caspase-3; MCF-7 and HCT116 cell lines; *Cichlidogyrus tilapia*; Palmatine, Jatrorrhizine

**Citation:** To be added by editorial staff during production.

Academic Editor: Firstname Lastname

Received: date

Revised: date

Accepted: date

Published: date

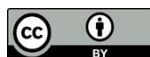

**Copyright:** © 2023 by the authors. Submitted for possible open access publication under the terms and conditions of the Creative Commons Attribution (CC BY) license (<https://creativecommons.org/licenses/by/4.0/>).

**Table S1:** The data of compounds (1-4) and B92 pending docking in Caspase-3 (PDB ID: 3KJF) active spots.

| Caspase-3 |                             |                                   |                                                   |                                                                    |
|-----------|-----------------------------|-----------------------------------|---------------------------------------------------|--------------------------------------------------------------------|
| Compound  | Energy score (S) (Kcal/mol) | Affinity Bond strength (Kcal/mol) | Affinity Bond length (in Å from the main residue) | Amino acids Receptor functional group                              |
| 1         | -5.71                       | -0.3                              | 3.16                                              | Ala 254 -CH <sub>2</sub> -dihydroisoquinoline                      |
|           |                             | -2.2                              | 1.94                                              | Arg 207 OCH <sub>3</sub>                                           |
|           |                             | -0.5                              | 3.49                                              | Phenyl of isoquinoline                                             |
|           |                             | -0.2                              | 3.44                                              | Gly 122 =C<br>H- phenyl of dihydro-isoquinoline                    |
| 2         | -5.58                       | -0.4                              | 4.03                                              | Cys163 OCH <sub>3</sub>                                            |
|           |                             | -0.2                              | 3.51                                              | =CH- phenyl of dihydro-isoquinoline                                |
|           |                             | -0.2                              | 3.29                                              | His 121 Phenyl of dihydro-isoquinoline                             |
|           |                             | -0.3                              | 4.94                                              | Phenyl of isoquinoline                                             |
|           |                             | -0.2                              | 4.50                                              | Met 61 Phenyl of isoquinoline                                      |
|           |                             | -0.2                              | 3.63                                              | Glu 123 CH <sub>2</sub> -dihydroisoquinoline                       |
|           |                             | -0.2                              | 3.29                                              | Gly 122 =CH- phenyl of isoquinoline<br>=CH- phenyl of isoquinoline |
| 3         | -5.61                       | -0.2                              | 4.20                                              | Tyr 204 CH <sub>2</sub> -dihydroisoquinoline                       |
|           |                             | -2.7                              | 2.62                                              | Ser 120 OH                                                         |
|           |                             | -0.2                              | 3.58                                              | Glu 123 =CH- phenyl of isoquinoline                                |
|           |                             | -0.2                              | 3.26                                              | Gly 122 =CH-phenyl of isoquinoline                                 |
| 4         | -6.19                       | -0.4                              | 4.20                                              | Phe 256 -CH <sub>2</sub> -cyclopentane ring                        |
|           |                             | -0.8                              | 3.14                                              | Cys 163 OH                                                         |
|           |                             | -0.2                              | 3.78                                              | -CH <sub>2</sub> -phenanthrenol ring                               |
|           |                             | -1.1                              | 2.92                                              | His 121 OH                                                         |
|           |                             | -0.2                              | 3.75                                              | -CH <sub>2</sub> -phenanthrenol ring                               |
| B92       | -6.38                       | -0.3                              | 4.36                                              | Phe 256 -CH <sub>2</sub> -cinnoline ring                           |
|           |                             | -0.6                              | 4.81                                              | Asn 208 Phenyl ring                                                |
|           |                             | -2.7                              | 3.08                                              | Arg 207 C=O                                                        |
|           |                             | -0.4                              | 3.31                                              | OH                                                                 |
|           |                             | -0.3                              | 3.42                                              | Cys 163 C=O                                                        |
|           |                             | -0.2                              | 4.21                                              | CH <sub>2</sub> -pentanoic acid                                    |
|           |                             | -0.4                              | 3.03                                              | Thr 62 C=O                                                         |

**Table S2:** Physicochemical properties of compounds (1-4) (TPSA, Lipinskis' rule of five and Vebers' rule,)

| Cpd. No. | Number of HBD*<br><5 | Number of HBA*<br><10 | MlogP<br><4.15 | M.W.*<br>(g/mol)<br><500 | RT* | TPSA* | Lipiniskis' violations | Vebers' violations |
|----------|----------------------|-----------------------|----------------|--------------------------|-----|-------|------------------------|--------------------|
| 1        | 0                    | 4                     | 2.01           | 352.40                   | 4   | 40.80 | 0                      | 0                  |
| 2        | 1                    | 4                     | 1.78           | 338.38                   | 3   | 51.80 | 0                      | 0                  |
| 3        | 1                    | 4                     | 1.78           | 338.38                   | 3   | 51.80 | 0                      | 0                  |
| 4        | 1                    | 1                     | 6.73           | 414.71                   | 6   | 20.23 | 1: MLOGP>4.15          | 0                  |

\*HBD: Hydrogen bond donor, HBA: Hydrogen bond acceptor, M.W.: Molecular weight, RT= rotatable bond, TPSA: topological polar surface area, MLOGP= Moriguchi octanol-water partition coefficient.
